# Supplementary material
Source: MDPI journal article supplement (https://www.mdpi.com/1424-2818/13/8/336)
Supplement: s1 [file s1]

Supplementary data

Table S1. Distribution of *rbcL* haplotypes of *Pachymeniopsis lanceolata*.

| Country    | Korea |    |    |    |                |    |    |    |               |    |    |    |    |    |    |    |    |    |    |    |    |    |    |    | Japan |           |          |  |  |  |  |  |  |  |  |  |  | GenBank |
|------------|-------|----|----|----|----------------|----|----|----|---------------|----|----|----|----|----|----|----|----|----|----|----|----|----|----|----|-------|-----------|----------|--|--|--|--|--|--|--|--|--|--|---------|
| Region     | Jeju  |    |    |    | Southern coast |    |    |    | Eastern coast |    |    |    |    |    |    |    |    |    |    |    |    |    |    |    |       | Accession |          |  |  |  |  |  |  |  |  |  |  |         |
| Haplotypes | JJ    | SG | JD | GM | YS             | NH | TY | GA | GI            | US | GP | PH | YD | UJ | JB | SC | GW | SK | GS | FK | SM | ES | MS | OS | OT    | Total     | Number   |  |  |  |  |  |  |  |  |  |  |         |
| LR01       | 18    | 29 |    | 2  | 1              | 7  | 1  | 3  | 8             | 10 |    | 12 |    | 8  |    | 11 | 1  |    |    | 1  |    | 6  | 5  |    | 1     | 124       | MZ558314 |  |  |  |  |  |  |  |  |  |  |         |
| LR02       |       |    | 1  |    |                | 2  |    |    | 3             | 2  | 1  | 2  | 1  | 5  |    |    | 16 | 1  | 1  |    |    |    |    |    |       | 35        | MZ558315 |  |  |  |  |  |  |  |  |  |  |         |
| LR03       |       |    |    |    |                |    |    |    |               |    |    | 2  |    | 10 | 1  |    |    |    |    |    |    |    |    |    |       | 13        | MZ558316 |  |  |  |  |  |  |  |  |  |  |         |
| LR04       |       |    |    |    |                |    |    |    |               |    |    |    |    | 1  |    |    |    |    |    |    |    |    |    |    |       | 1         | MZ558317 |  |  |  |  |  |  |  |  |  |  |         |
| LR05       |       |    |    |    |                |    |    |    |               |    |    |    |    | 1  |    |    |    |    |    |    |    |    |    |    |       | 1         | MZ558318 |  |  |  |  |  |  |  |  |  |  |         |
| LR06       |       |    |    |    |                |    |    |    |               | 1  | 10 |    |    | 1  | 3  |    |    |    |    |    |    |    |    |    |       | 15        | MZ558319 |  |  |  |  |  |  |  |  |  |  |         |
| LR07       |       |    |    |    |                |    |    |    |               |    |    | 1  |    |    | 2  |    |    |    |    |    |    |    |    |    |       | 3         | MZ558320 |  |  |  |  |  |  |  |  |  |  |         |
| LR08       |       |    |    |    |                |    |    |    |               |    |    | 5  |    |    |    |    |    |    |    |    |    |    |    |    |       | 5         | MZ558321 |  |  |  |  |  |  |  |  |  |  |         |
| LR09       |       |    |    |    |                |    |    |    |               | 1  |    |    |    |    |    |    |    |    |    |    |    |    |    |    |       | 1         | MZ558322 |  |  |  |  |  |  |  |  |  |  |         |
| LR10       |       |    |    |    |                |    |    |    |               |    |    | 1  |    |    |    |    |    |    |    |    |    |    |    |    |       | 1         | MZ558323 |  |  |  |  |  |  |  |  |  |  |         |
| LR11       |       |    |    |    |                |    |    |    |               |    |    |    |    |    |    |    |    |    |    | 1  |    |    |    | 1  |       | 2         | AB055477 |  |  |  |  |  |  |  |  |  |  |         |
| LR12       |       |    |    |    |                |    |    |    |               |    |    |    |    |    |    |    | 2  | 1  | 1  |    |    |    |    |    |       | 4         | GU168556 |  |  |  |  |  |  |  |  |  |  |         |
| LR13       |       |    |    |    |                |    |    |    |               |    |    |    |    |    |    |    | 1  |    |    |    |    |    |    |    |       | 1         | GU168557 |  |  |  |  |  |  |  |  |  |  |         |
| LR14       |       |    |    |    |                |    |    |    |               |    |    |    |    |    |    |    |    |    |    |    | 2  |    |    |    |       | 2         | MZ558325 |  |  |  |  |  |  |  |  |  |  |         |
| LR15       |       |    |    |    |                |    |    |    |               |    |    |    |    |    |    |    |    |    |    |    | 7  |    |    |    |       | 7         | MZ558326 |  |  |  |  |  |  |  |  |  |  |         |
| Total      | 18    | 29 | 1  | 2  | 1              | 9  | 1  | 3  | 11            | 12 | 3  | 33 | 1  | 26 | 6  | 11 | 20 | 2  | 2  | 2  | 9  | 6  | 5  | 1  | 1     | 215       |          |  |  |  |  |  |  |  |  |  |  |         |

JJ, Jejusi; SG, Seogwipo; JD, Jindo; GM, Geomundo; YS, Yeosu; NH, Namhaedo; TY, Tongyeong; GA, Gwanganri; GI, Gijang; US, Ulsan; GP, Gampo; PH, Pohang; YD, Yeongdeok; UJ, Uljin; JB, Jukbyeon; SC, Samcheok; GW, Gangwon; SK, Sokcho; GS, Goseong; FK, Fukuoka; SM, Shimoda; ES, Enoshima; MS, Misaki; OS, Oshoro; OT, Otaru

**Table S2.** Distribution of *rbcL* haplotypes of *Pachymeniopsis elliptica*

| Country    | Korea |    |    |    |    |    |    |    |       |    |    |    |    |    |    |    |       | GenBank   |
|------------|-------|----|----|----|----|----|----|----|-------|----|----|----|----|----|----|----|-------|-----------|
| Region     | Jeju  |    |    |    |    |    |    |    | Japan |    |    |    |    |    |    |    |       | Accession |
| Haplotypes | JJ    | SG | WD | GM | TY | GJ | HA | GI | US    | GP | PH | JB | SM | MS | KS | HK | Total | Number    |
| ER01       | 40    | 12 | 7  | 12 | 5  | 4  | 8  | 23 | 2     |    | 9  | 1  | 4  | 3  | 2  | 1  | 133   | MZ558327  |
| ER02       | 1     |    |    |    |    |    |    |    |       |    |    |    |    |    |    |    | 1     | MZ558328  |
| ER03       |       |    |    |    |    |    |    |    |       |    | 1  |    |    |    |    |    | 1     | MZ558329  |
| ER04       |       |    |    |    |    |    |    |    |       |    | 1  |    |    |    |    |    | 1     | MZ558330  |
| ER05       |       |    |    |    |    |    |    |    |       | 1  |    |    |    |    |    |    | 1     | MZ558331  |
| ER06       |       |    |    |    | 1  |    |    |    |       |    |    |    |    |    |    |    | 1     | MZ558332  |
| Total      | 41    | 12 | 7  | 12 | 6  | 4  | 8  | 23 | 2     | 1  | 11 | 1  | 4  | 3  | 2  | 1  | 138   |           |

JJ, Jejusi; SG, Seogwipo; WD, Wando; GM, Geomundo; TY, Tongyeong; GJ, Geoje; HA, Haeundae; GI, Gijang; US, Ulsan; GP, Gampo; PH, Pohang; JB, Jukbyeon; SM, Shimoda; MS, Misaki; KS, Katsuura; HK, Hakodate

(A) *Pachymeniopsis lanceolata*

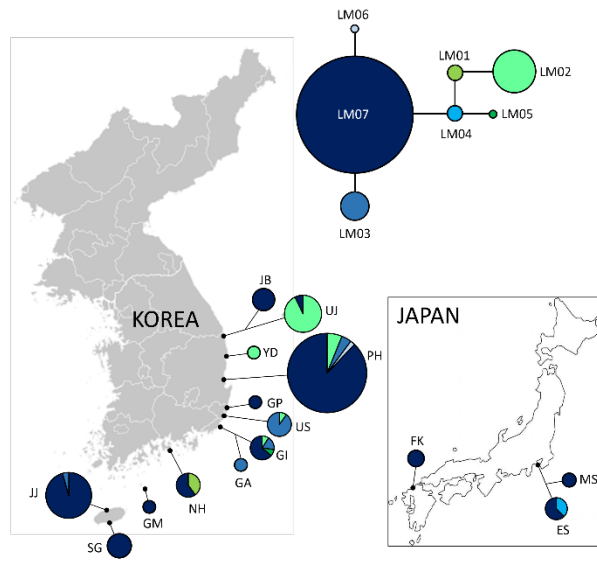

(B) *Pachymeniopsis elliptica*

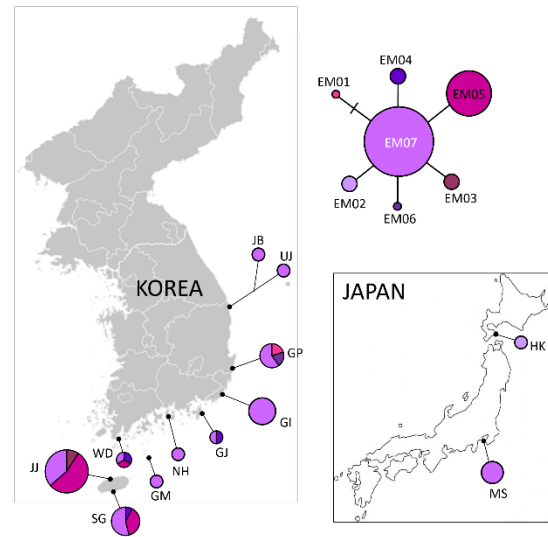

**Figure S1.** Geographic distribution of haplotypes and haplotype networks of *Pachymeniopsis lanceolata* (A) and *P. elliptica* (B) based on the mitochondrial COI-5P gene. On the map, each circle represents a location and the proportion of pie chart indicates the frequency of specimens for each haplotype. The pie chart color corresponds to the one used in haplotype networks. In the network, each connecting lines represent single mutational steps. The vertical bars represent the number of mutational steps between two haplotypes when >1.
